# Supplementary material
Source: HighWire-hosted journal article supplement (doi:10.1101/rna.051565.115)
Supplement: SuppLegends.docx [file SuppLegends.docx]

**Figure S1. Proteins used for CAF1 tethered function assays are expressed in the oocyte.**

Western blots with α-HA antibody were conducted to test expression of the CAF1 wild type and mutant proteins used for tethered function assays in Figure 1. Actin served as a loading control. Western blots depict a single representative experiment, and three biological replicates were conducted.

**Figure S2. Proteins used for NOT1 tethered function assays are expressed in the oocyte.**

Western blots with α-HA antibody were conducted to test expression of the NOT1 fragments and mutants used for tethered function assays in Figure 4. Actin served as a loading control. Western blots depict a single representative experiment, and three biological replicates were conducted.

**Figure S3. Protein expression for modified tethered function assay with 4E-T constructs.**

Western blots with α-HA antibody were conducted to test expression of the co-expressed 4E-T constructs as well as CAF1, Xp54 and the NOT1 MIF4G domain. Actin served as a loading control. Western blots depict a single representative experiment, and three biological replicates were conducted.

**Figure S4. Protein expression for tethered function assay with IRES reporters.**

Western blots with α-HA antibody were conducted to test expression of GLD2 D242A, Xp54, CAF1b, and CAF1b DE-AA. Actin served as a loading control. Western blots depict a single representative experiment, and three biological replicates were conducted.

**Table S1. Mass spectrometry reveals protein partners specific to wild type CAF1.**

Tables depicting proteins identified by mass spectrometry that were specific to the wild type CAF1 proteins. Uniprot IDs are also provided. Only proteins with at least a two-fold enrichment over the mutant CAF1 proteins (relative to GST alone) and with p<0.05 are depicted.
